# Supplementary material for: A deep learning framework based on SSM for detecting small and occluded objects in complex underwater environments
Source: Research Square preprint supplement (doi:10.21203/rs.3.rs-5228280/v1), 2024-10-15
Supplement: Supplementary file 1 [file 9f28b32a38b863c91a2b49fe.docx]

****Table 1** Performance comparison of different models on the URPC2020 validation set**.

| Datasets | Models | Precision | Recall | mAP50 | mAP50-95 | Para | GFLOPs | Para(M) |
| --- | --- | --- | --- | --- | --- | --- | --- | --- |
| URPC2020 | YOLOv5s | 0.855 | 0.775 | 0.825 | 0.496 | 703w | 16.5 | 14.1 |
| YOLOv7 | 0.822 | 0.754 | 0.822 | 0.443 | 933w | 26.0 | 18.1 |
| YOLOv8s | 0.846 | 0.771 | 0.846 | 0.501 | 1113w | 28.4 | 21.5 |
| YOLOv9t | 0.831 | 0.759 | 0.831 | 0.485 | 280w | 11.7 | 23.4 |
| YOLOv10s | 0.822 | 0.783 | 0.845 | 0.496 | 804w | 24.5 | 15.8 |
| Mamba-YOLO-B | 0.823 | 0.794 | 0.846 | 0.501 | 2180w | 49.6 | 41.9 |
| RT-DETR(Res50) | 0.821 | 0.784 | 0.842 | 0.482 | 3266w | 85.1 | 65.9 |
| baseline | 0.815 | 0.764 | 0.827 | 0.483 | 300w | 8.1 | 6.1 |
| Ours | 0.842 | 0.772 | 0.851 | 0.51 | 667w | 21.1 | 13.5 |

****Table 2** Accuracy comparison of different models on two different test sets of URPC2020.**

| Datasets | | Models | Precision | Recall | holothurian | echinus | scallop | starfish | mAP50 | mAP50-95 |
| --- | --- | --- | --- | --- | --- | --- | --- | --- | --- | --- |
| URPC2020 | TESTA | YOLOv5s | 0.83 | 0.646 | 0.695 | 0.855 | 0.585 | 0.726 | 0.715 | 0.414 |
| YOLOv7 | 0.77 | 0.67 | 0.703 | 0.86 | 0.615 | 0.762 | 0.735 | 0.39 |
| YOLOv8s | 0.824 | 0.638 | 0.69 | 0.862 | 0.614 | 0.754 | 0.73 | 0.408 |
| YOLOv9t | 0.793 | 0.637 | 0.676 | 0.847 | 0.594 | 0.746 | 0.716 | 0.402 |
| YOLOv10s | 0.805 | 0.657 | 0.721 | 0.876 | 0.615 | 0.756 | 0.742 | 0.405 |
| Mamba-YOLO-B | 0.811 | 0.739 | 0.731 | 0.869 | 0.606 | 0.75 | 0.739 | 0.415 |
| RT-DETR(Res50) | 0.791 | 0.667 | 0.702 | 0.854 | 0.624 | 0.798 | 0.745 | 0.413 |
| baseline | 0.789 | 0.627 | 0.658 | 0.848 | 0.569 | 0.732 | 0.702 | 0.392 |
| Ours | 0.819 | 0.655 | 0.713 | 0.875 | 0.634 | 0.78 | 0.751 | 0.424 |
| TESTB | YOLOv5s | 0.816 | 0.618 | 0.637 | 0.836 | 0.518 | 0.71 | 0.675 | 0.387 |
| YOLOv7 | 0.761 | 0.629 | 0.618 | 0.868 | 0.54 | 0.733 | 0.69 | 0.366 |
| YOLOv8s | 0.796 | 0.61 | 0.603 | 0.861 | 0.558 | 0.748 | 0.693 | 0.382 |
| YOLOv9t | 0.782 | 0.584 | 0.568 | 0.863 | 0.521 | 0.729 | 0.67 | 0.371 |
| YOLOv10s | 0.752 | 0.639 | 0.623 | 0.864 | 0.552 | 0.737 | 0.694 | 0.38 |
| Mamba-YOLO-B | 0.76 | 0.642 | 0.612 | 0.864 | 0.545 | 0.734 | 0.689 | 0.381 |
| RT-DETR(Res50) | 0.779 | 0.651 | 0.648 | 0.865 | 0.571 | 0.792 | 0.719 | 0.396 |
| baseline | 0.782 | 0.584 | 0.563 | 0.847 | 0.504 | 0.726 | 0.66 | 0.362 |
| Ours | 0.768 | 0.64 | 0.637 | 0.875 | 0.567 | 0.76 | 0.709 | 0.397 |

****Table 3** Accuracy comparison of different models on the URPC2021 and DUO test sets.**

| Datasets | Models | Precision | Recall | holothurian | echinus | scallop | starfish | mAP50 | mAP50-95 |
| --- | --- | --- | --- | --- | --- | --- | --- | --- | --- |
| DUO | YOLOv5s | 0.857 | 0.78 | 0.857 | 0.924 | 0.667 | 0.922 | 0.843 | 0.622 |
| YOLOv7 | 0.863 | 0.764 | 0.875 | 0.929 | 0.672 | 0.928 | 0.851 | 0.629 |
| YOLOv8s | 0.858 | 0.766 | 0.871 | 0.924 | 0.683 | 0.928 | 0.851 | 0.676 |
| YOLOv9t | 0.846 | 0.747 | 0.846 | 0.926 | 0.642 | 0.926 | 0.835 | 0.65 |
| YOLOv10s | 0.883 | 0.762 | 0.882 | 0.928 | 0.684 | 0.934 | 0.857 | 0.669 |
| Mamba-YOLO-B | 0.885 | 0.75 | 0.873 | 0.927 | 0.674 | 0.935 | 0.852 | 0.67 |
| RT-DETR(Res50) | 0.858 | 0.733 | 0.862 | 0.903 | 0.635 | 0.91 | 0.828 | 0.609 |
| baseline | 0.841 | 0.747 | 0.836 | 0.922 | 0.642 | 0.925 | 0.831 | 0.635 |
| Ours | 0.826 | 0.805 | 0.885 | 0.933 | 0.692 | 0.94 | 0.862 | 0.68 |
| URPC2021 | YOLOv5s | 0.842 | 0.757 | 0.72 | 0.907 | 0.795 | 0.872 | 0.824 | 0.473 |
| YOLOv7 | 0.833 | 0.74 | 0.734 | 0.912 | 0.767 | 0.885 | 0.824 | 0.461 |
| YOLOv8s | 0.829 | 0.767 | 0.745 | 0.909 | 0.813 | 0.893 | 0.84 | 0.507 |
| YOLOv9t | 0.821 | 0.76 | 0.731 | 0.908 | 0.796 | 0.889 | 0.831 | 0.491 |
| YOLOv10s | 0.834 | 0.766 | 0.754 | 0.912 | 0.813 | 0.896 | 0.843 | 0.504 |
| Mamba-YOLO-B | 0.846 | 0.769 | 0.751 | 0.915 | 0.816 | 0.896 | 0.845 | 0.515 |
| RT-DETR(Res50) | 0.823 | 0.733 | 0.752 | 0.902 | 0.811 | 0.882 | 0.836 | 0.485 |
| baseline | 0.828 | 0.742 | 0.722 | 0.903 | 0.787 | 0.884 | 0.824 | 0.485 |
| Ours | 0.832 | 0.766 | 0.751 | 0.915 | 0.82 | 0.897 | 0.846 | 0.512 |

****Table 4** Distribution and quantity of target annotation boxes for various categories across different datasets.**

| Datasets | Class | Small | Medium | Large |
| --- | --- | --- | --- | --- |
| URPC2020  (Test A) | holothurian | 142 | 204 | 27 |
| echinus | 1709 | 324 | 15 |
| scallop | 3001 | 233 | 3 |
| starfish | 760 | 159 | 4 |
| URPC2020  (Test B) | holothurian | 206 | 240 | 15 |
| echinus | 3571 | 638 | 24 |
| scallop | 3021 | 170 | 5 |
| starfish | 1269 | 220 | 11 |
| DUO | holothurian | 2512 | 5065 | 310 |
| echinus | 40168 | 9485 | 503 |
| scallop | 984 | 853 | 87 |
| starfish | 10122 | 4341 | 85 |
| URPC2021 | holothurian | 2814 | 3759 | 266 |
| echinus | 19117 | 6724 | 380 |
| scallop | 8988 | 1560 | 83 |
| starfish | 7570 | 2874 | 103 |
| URPC2020 | holothurian | 2016 | 3297 | 224 |
| echinus | 16119 | 5928 | 296 |
| scallop | 5377 | 1268 | 75 |
| starfish | 4600 | 2189 | 52 |

****Table 5** Ablation study results of the model on the two test sets of URPC2020.**

| **Test A** | | | | | | | | |
| --- | --- | --- | --- | --- | --- | --- | --- | --- |
| Model | SODH | SPDConv | MSDBlock | MSFF | Precision | Recall | Map50 | Map50-95 |
| Baseline | **×** | **×** | **×** | **×** | 0.789 | 0.627 | 0.702 | 0.392 |
| Baseline-A | **√** | **×** | **×** | **×** | 0.789 | 0.632 | 0.715 | 0.402 |
| Baseline-B | **√** | **√** | **×** | **×** | 0.786 | 0.639 | 0.722 | 0.405 |
| Baseline-C | **√** | **√** | **√** | **×** | 0.809 | 0.643 | 0.735 | 0.414 |
| UWNet | **√** | **√** | **√** | **√** | 0.819 | 0.655 | 0.751 | 0.424 |
| **Test B** | | | | | | | | |
| Model | SODH | SPDConv | MSDBlock | MSFF | Precision | Recall | Map50 | Map50-95 |
| Baseline | **×** | **×** | **×** | **×** | 0.782 | 0.584 | 0.66 | 0.362 |
| Baseline-A | **√** | **×** | **×** | **×** | 0.76 | 0.604 | 0.669 | 0.371 |
| Baseline-B | **√** | **√** | **×** | **×** | 0.774 | 0.61 | 0.684 | 0.381 |
| Baseline-C | **√** | **√** | **√** | **×** | 0.762 | 0.642 | 0.702 | 0.392 |
| UWNet | **√** | **√** | **√** | **√** | 0.768 | 0.64 | 0.709 | 0.397 |
